# Supplementary material for: Characterization of atmospheric methane release in the outer Mackenzie River Delta from biogenic and thermogenic sources
Source: Copernicus journal article supplement (doi:10.5194/egusphere-2022-549), 2022-09-13
Supplement: Supplementary file 1 [file egusphere-2022-549-supplement.pdf]

# Characterization of atmospheric methane release in the outer Mackenzie River Delta from biogenic and thermogenic sources – Supplemental Material.

5

**Table S1: Site locations and CH<sub>4</sub> source isotopic signatures.**

| Site                                                           | Latitude | Longitude  | Source $\delta^{13}\text{C-CH}_4$ (‰) | R <sup>2</sup> | Max CH <sub>4</sub> (ppm) | Max wind speed (km/h) | Site Type    |
|----------------------------------------------------------------|----------|------------|---------------------------------------|----------------|---------------------------|-----------------------|--------------|
| Wetland 1 (fall)                                               | 68.9691° | -134.7168° | -88.3                                 | 0.999          | 62.50                     | 16.2                  | Aquatic seep |
| Pingo 3 (fall)                                                 | 68.9393° | -134.4114° | -73.6                                 | 0.987          | 3.19                      | 2.6                   | Aquatic seep |
| channel seep                                                   | 69.3197° | -135.4775° | -42.5                                 | 0.982          | 27.00                     | 10.5                  | Aquatic seep |
| Wetland 1 (summer)                                             | 68.9691° | -134.7168° | -56.4                                 | 0.927          | 18.46                     | 5.0                   | Aquatic seep |
| Pingo 2                                                        | 69.2856° | -135.5039° | -63.6                                 | 0.845          | 2.58                      | 10.5                  | Polar V      |
| Pingo 1                                                        | 69.0888° | -135.7951° | -53.0                                 | 0.722          | 5.62                      | 5.5                   | Polar V      |
| Wetland 3                                                      | 69.2088° | -135.2714° | -71.9                                 | 0.675          | 2.23                      | 6.0                   | Polar V      |
| Wetland 2                                                      | 68.9243° | -135.3883° | -78.4                                 | 0.596          | 2.19                      | 10.0                  | Polar V      |
| Lake 1 (summer)                                                | 69.2294° | -135.2441° | -44.7                                 | 0.480          | 7.57                      | N/A                   | Aquatic seep |
| <b>Sites sampled but not reported due to low R<sup>2</sup></b> |          |            |                                       |                |                           |                       |              |
| Pingo 1 (fall)                                                 | 69.0888° | -135.7951° | -2.9                                  | 0.434          | 2.02                      | 14.2                  | Polar V      |
| Pingo 3 (summer)                                               | 68.9393° | -134.4114° | -59.0                                 | 0.119          | 2.26                      | 3.6                   | Aquatic seep |
| Lake 1 (fall)                                                  | 69.2294° | -135.2441° | -79.3                                 | 0.040          | 2.09                      | 14.0                  | Aquatic seep |
| Site 9                                                         | 68.9466° | -135.8452° | -35.0                                 | 0.016          | 1.98                      | 3.5                   | Polar V      |

**Table S2: Flux rates for Pingo 3 and Lake 1. Pingo 3 and Lake 1 were both sources of CH<sub>4</sub> and CO<sub>2</sub>.**

| Site                                                       | Pingo 3 | Lake 1  |
|------------------------------------------------------------|---------|---------|
| CH <sub>4</sub> (mg CH <sub>4</sub> -C/hr/m <sup>2</sup> ) | 0.8667  | 2.2551  |
| standard deviation                                         | 0.1329  | 0.9219  |
| CO <sub>2</sub> (mg CO <sub>2</sub> -C/hr/m <sup>2</sup> ) | 1.703   | 52.7348 |
| Standard deviation                                         | 0.2061  | 45.9352 |

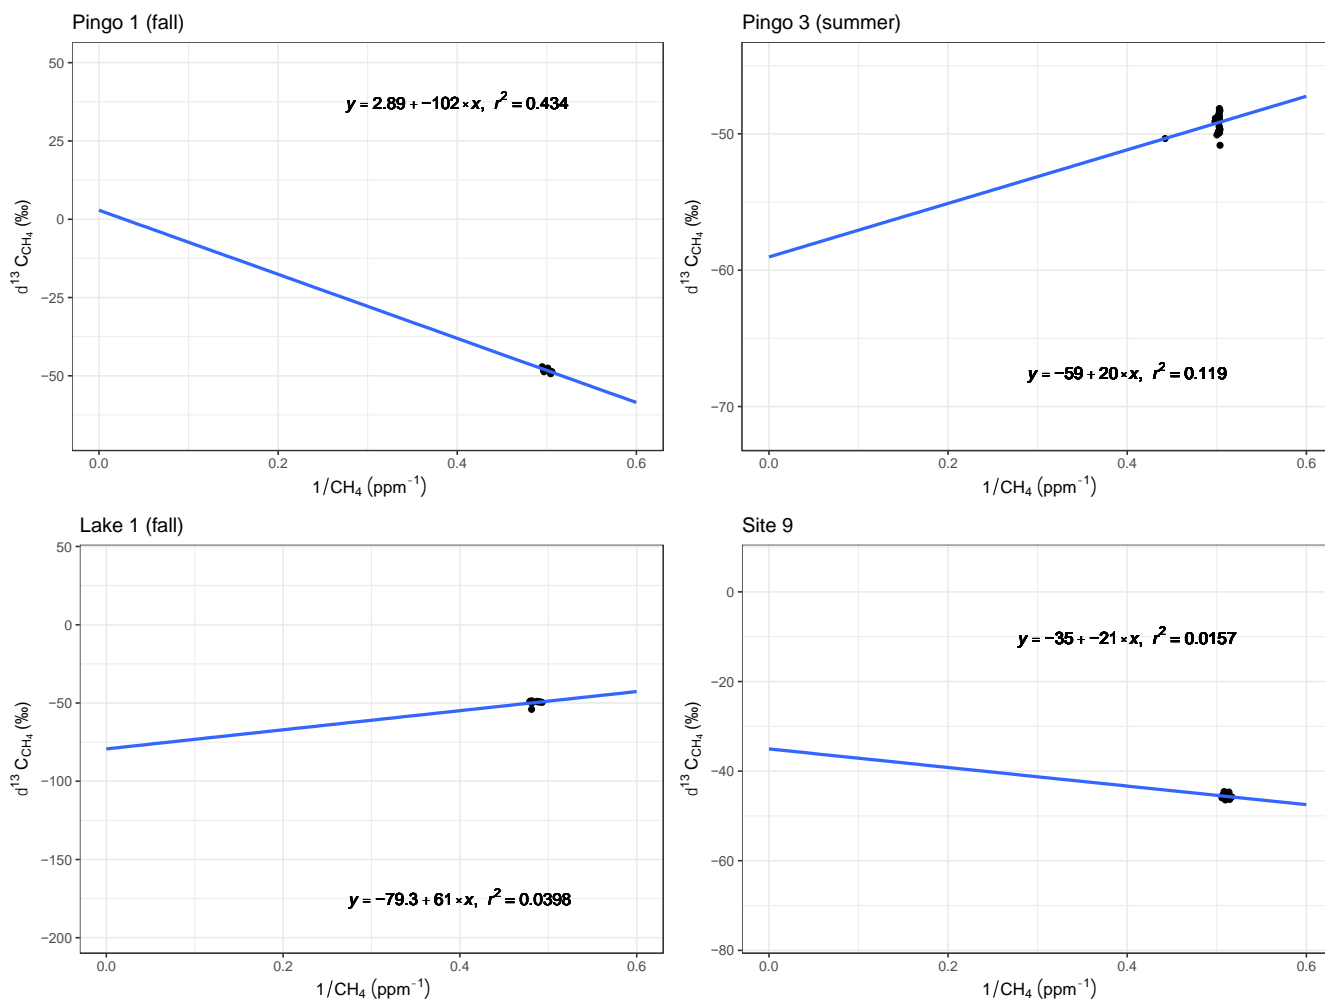

Figure S1: Keeling plots for Pingo 1 (fall), Site 9, Pingo 3 (summer), Lake 1 (fall) and Site 10. Pingo 1, Site 9 and Site 10 were identified as areas of high flux rate by aerial surveys but could not be verified during this study. Pingo 3 and Lake 1 were identified in October by holes in the ice caused by high rate ebullition. Regression analysis was inconclusive and not included in the main analysis. All plots had low  $R^2$  values due to low  $\text{CH}_4$  concentrations. The maximum  $\text{CH}_4$  measured at any site was at Pingo 3 and was 2.261 ppm.

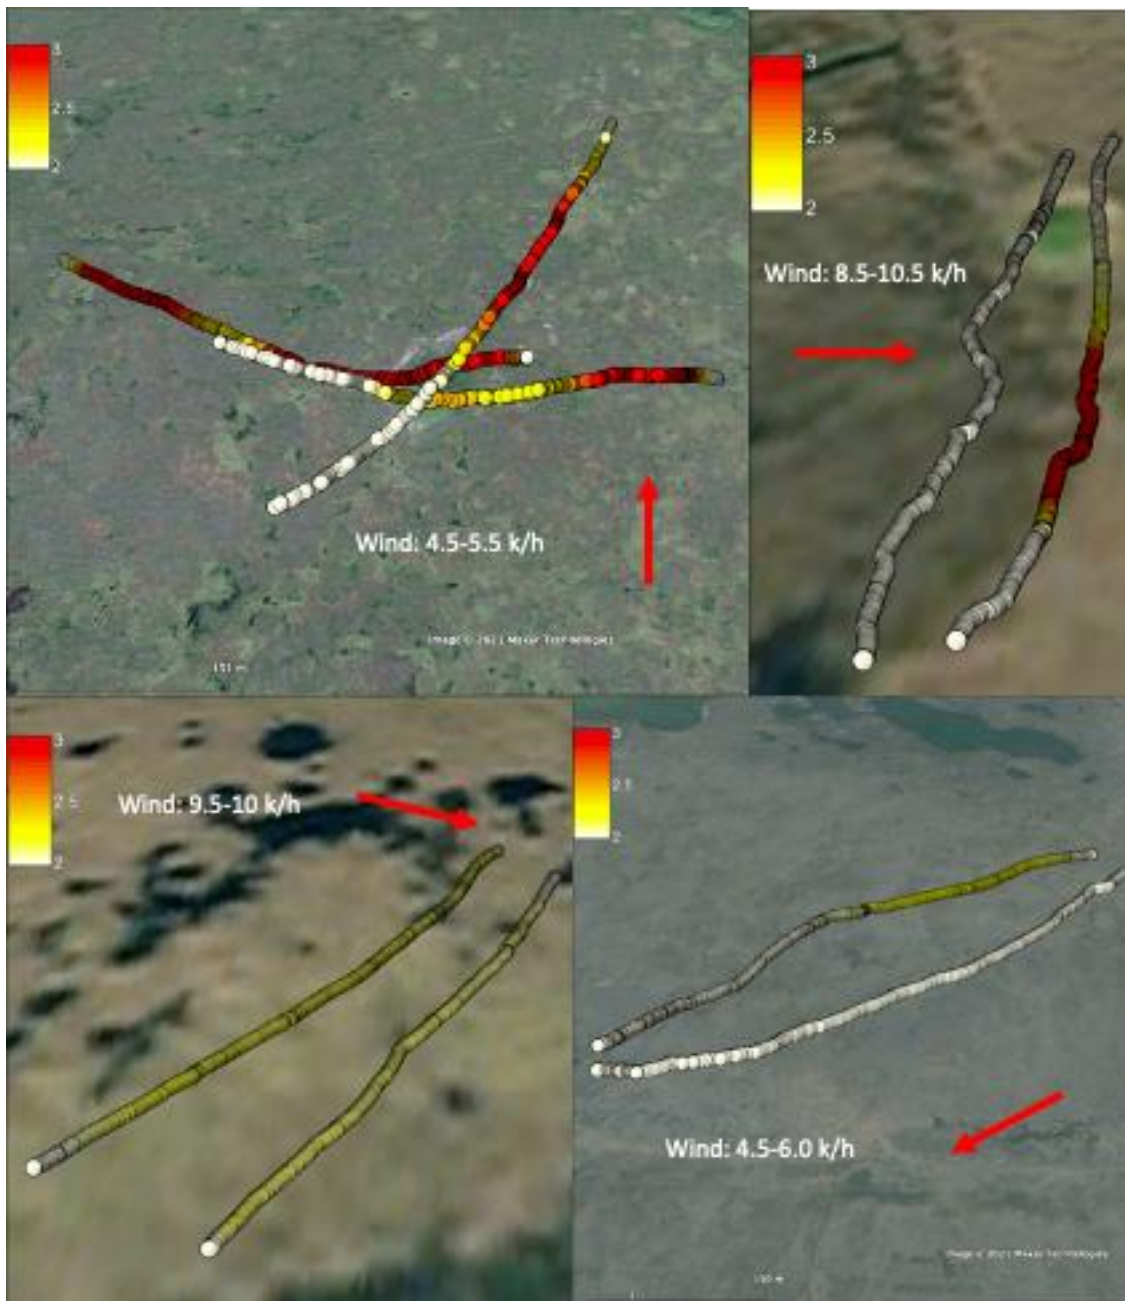

20 **Figure S2:** Walking transects of CH<sub>4</sub> concentrations at sample sites, scale is in ppm. Sites are (clockwise from top left): Pingo 1, Pingo 2, Wetland 2, Wetland 3 (© Google Earth).
